# Supplementary material for: A π-stacking highly stable insensitive energetic inner salt and its insensitive energetic salts
Source: Royal Society of Chemistry journal article supplement (doi:10.1039/d3ce00209h), 2023-01-01
Supplement: d3ce00209h1.pdf [file d3ce00209h1.pdf]

## Supporting Information

### **A $\pi$ -stacking highly stable insensitive energetic inner salt and its insensitive energetic salts**

Jinhao Zhang<sup>1</sup>, Zhiyuan Jin<sup>1</sup>, Yunlong Xia<sup>1</sup>, Ying Li, Wenjia Hao<sup>1</sup>, Zhicheng Guo<sup>2</sup>, Ying Wang<sup>3</sup>,  
Rufang Peng<sup>1</sup>, Bo Jin<sup>1\*</sup>

(<sup>1</sup> State Key Laboratory of Environment-friendly Energy Materials, School of Materials Science and Engineering, Southwest University of Science and Technology, Mianyang, 621010; <sup>2</sup> School of National Defense Science and Technology, Southwest University of Science and Technology, Mianyang, 621010; <sup>3</sup> Institute of Chemical Materials, China Academy of Engineering Physics (CAEP), Mianyang 621000, China)

(Corresponding author: Bo Jin, E-mail: [jinbo0428@163.com](mailto:jinbo0428@163.com))

## **Table of Contents**

|                                         |           |
|-----------------------------------------|-----------|
| <b>Experimental Section.....</b>        | <b>3</b>  |
| <b>Nuclear magnetic resonance. ....</b> | <b>5</b>  |
| <b>Heats of formation .....</b>         | <b>13</b> |
| <b>Reference .....</b>                  | <b>13</b> |

## Experimental Section

**Safety Precautions! Carefully!** Although we experienced no difficulties in the synthesis and characterization of these materials, small-scale syntheses are strongly encouraged. All of the compounds should be handled with extreme care, and eye protection and gloves must be worn at all times.

**General Methods.** Chemical reagents and solvents were purchased from Aladdin (Shanghai, China) and used as supplied without further purification.  $^1\text{H}$  NMR and  $^{13}\text{C}$  NMR spectra were obtained using a JEOL GSX 600 MHz nuclear magnetic resonance (NMR) spectrometer in a DMSO solution by using tetramethylsilane as an internal standard. Fourier transform infrared (FT-IR) spectra were recorded on a Nicolet-5700 FTIR spectrometer by using pressed KBr pellets to evaluate the chemical bonding of the samples from  $4000\text{ cm}^{-1}$  to  $400\text{ cm}^{-1}$ . Elemental analyses (C, H, and N) were conducted using a Vario EL CUBE device. DSC was performed by a Q200 DSC instrument (TA Instruments, United States) at a heating rate of  $10\text{ }^\circ\text{C min}^{-1}$  in flowing high-purity nitrogen. TGA was performed with an STA 449 F5 TGA instrument (Netzsch Instruments, Germany) at a heating rate of  $10\text{ }^\circ\text{C min}^{-1}$  in flowing high-purity nitrogen.

### Synthesis of 5-(1*H*-1,2,4-triazol-4-ium-3-yl)-1*H*-tetrazol-1-olate monohydrate ( $\text{TzTO}\cdot\text{H}_2\text{O}$ , $1\cdot\text{H}_2\text{O}$ ):

5-(1*H*-1,2,4-triazol-4-ium-3-yl)-1*H*-tetrazol-1-olate monohydrate was synthesized through four reaction steps, as shown in Scheme S1.

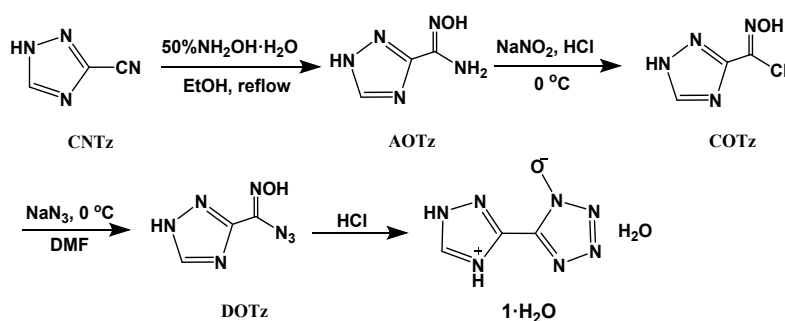

Scheme S1 Synthesis pathway of  $1\cdot\text{H}_2\text{O}$

**1*H*-1,2,4-triazole-3-hydroxamamide (AOTz):** 1*H*-1,2,4-triazole-3-carbonitrile (4.70 g, 50 mmol) was suspended in 30 mL ethanol, added 0.75 mL of 50 wt% aqueous hydroxylamine into the suspension, which reacted with reflux at  $90\text{ }^\circ\text{C}$  for 2 h. The mixture was cooled to room temperature, and filtered, and dried to yield 6.22 g (98%) of the white powder crystal.  $T_d(\text{DSC}, 10\text{ }^\circ\text{C}\cdot\text{min}^{-1})$ :  $197\text{ }^\circ\text{C}$ .  $^1\text{H}$  NMR (DMSO- $d_6$ , 600 MHz)  $\delta/\text{ppm}$ : 14.28 (1H, NOH), 9.98 (1H, NH), 8.04 (1H, CH), 5.84 (2H,  $\text{NH}_2$ ).  $^{13}\text{C}$  NMR (DMSO- $d_6$ , 150 MHz)  $\delta/\text{ppm}$ : 150.09, 148.06, 143.38. IR (KBr)  $\nu/\text{cm}^{-1}$ : 3434, 1657, 1426, 1339, 1282, 1098, 984, 873, 804, 535. Elemental analysis (%) calcd for  $\text{C}_3\text{H}_5\text{N}_5\text{O}$  (127.11): C 28.35, H 3.97, N 55.10; found: C 28.32, H 4.01, N 55.09.

**1*H*-1,2,4-triazole-3-carbohydroximoylchloride (COTz):** 1*H*-1,2,4-triazole-3-hydroxamamide (2.54 g, 20 mmol) was suspended in 15 mL water and 27.5 mL concentrated hydrochloric acid. At  $0\text{ }^\circ\text{C}$ , a saturated

solution of NaNO<sub>2</sub> (1.42 g, 20 mmol) was slowly added dropwise to the suspension. After the dropwise addition, the reaction was carried out at low temperature for 2.5 h, filtered and dried to yield 2.45 g (94%) of white product. *T<sub>m</sub>*(DSC, 10 °C·min<sup>-1</sup>): 130 °C. *T<sub>d</sub>*(DSC, 10 °C·min<sup>-1</sup>): 206 °C. <sup>1</sup>H NMR (DMSO-*d*<sub>6</sub>, 600 MHz) δ/ppm: 12.67 (1H, NOH), 8.98 (1H, NH), 8.61 (1H, CH). <sup>13</sup>C NMR (DMSO-*d*<sub>6</sub>, 150 MHz) δ/ppm: 155.23, 146.27, 128.73. IR (KBr) ν/cm<sup>-1</sup>: 3452, 1675, 1541, 1475, 1278, 1178, 1033, 979, 937. Elemental analysis (%) calcd for C<sub>3</sub>H<sub>3</sub>ClN<sub>4</sub>O (146.53): C 24.59, H 2.06, N 38.24; found: C 24.63, H 2.04, N 38.21.

*1H-1,2,4-triazole-3-carbohydroximoylazine* (DOTz): *1H-1,2,4-triazole-3-carbohydroximoylchloride* (0.876 g, 6 mmol) was suspended in DMF. At 0 °C, 0.5 g sodium azide (0.77 mmol) was added in batches. The suspension was stirred for 30 min and 50 mL of water was added. The mixture was placed in the refrigerator at -18 °C for 2 h, and a white solid was precipitated, filtered, and dried to yield 0.872 g (95%). *T<sub>melt</sub>*(DSC, 10 °C·min<sup>-1</sup>): 113 °C. *T<sub>d</sub>*(DSC, 10 °C·min<sup>-1</sup>): 145 °C. <sup>1</sup>H NMR (DMSO-*d*<sub>6</sub>, 600 MHz) δ/ppm: 15.27 (1H, NOH), 11.90 (1H, NH), 8.97 (1H, CH). <sup>13</sup>C NMR (DMSO-*d*<sub>6</sub>, 150 MHz) δ/ppm: 163.06, 146.73, 138.45. IR (KBr) ν/cm<sup>-1</sup>: 3458, 1675, 1541, 1475, 1278, 1178, 1033, 979, 937, 800, 617, 489, 466. Elemental analysis (%) calcd for C<sub>3</sub>H<sub>3</sub>N<sub>7</sub>O (153.11): C 23.53, H 1.98, N 64.04; found: C 23.55, H 2.01, N 64.02.

*5-(1H-1,2,4-triazol-4-ium-3-yl)-1H-tetrazol-1-olate monohydrate* (TzTO·H<sub>2</sub>O): *1H-1,2,4-triazole-3-carbohydroximoylazine* (3.06 g, 20 mmol) was suspended in 50 mL of concentrated hydrochloric acid, and the reaction was stirred at room temperature for 12 h and 150 mL of water was added. White product was filtered, and dried to yield 3.283 g (96%). *T<sub>melt</sub>*(DSC, 10 °C·min<sup>-1</sup>): 114 °C. *T<sub>d</sub>*(DSC, 10 °C·min<sup>-1</sup>): 261 °C. <sup>1</sup>H NMR (DMSO-*d*<sub>6</sub>, 600 MHz) δ/ppm: 8.92 (2H, 2NH), 6.75 (1H, CH). <sup>13</sup>C NMR (DMSO-*d*<sub>6</sub>, 150 MHz) δ/ppm: 148.30, 146.32, 141.80. IR (KBr) ν/cm<sup>-1</sup>: 3433, 1650, 1384, 1092, 987, 862, 532. Elemental analysis (%) calcd for C<sub>3</sub>H<sub>5</sub>N<sub>7</sub>O<sub>2</sub> (171.14): C 21.06, H 2.95, N 57.30; found: C 21.03, H 2.98, N 57.33.

#### **General procedure for the synthesis of the energetic salts 2–4.**

*5-(1H-1,2,4-triazol-4-ium-3-yl)-1H-tetrazol-1-olate monohydrate* (0.171 g, 1 mmol) was dissolved in a few milliliters of distilled water. A solution of aqueous ammonia (1 mmol), hydroxylamine (1 mmol), and hydrazine monohydrate (1 mmol), was added. The reaction mixture was stirred for 0.5 h and the solvent was evaporated under reduced pressure. The solid obtained was purified by washing with ether.

**Ammonium 5-(1H-1,2,4-triazol-4-ium-3-yl)-1H-tetrazol-1-olate (2).** White solid (96% yield). DSC (10 °C min<sup>-1</sup>): 282 °C (dec). <sup>1</sup>H NMR (DMSO-*d*<sub>6</sub>, 600 MHz) δ/ppm: 8.20 (6H, 2NH, NH<sub>4</sub><sup>+</sup>). IR (KBr) ν/cm<sup>-1</sup>: 3399, 2379, 1648, 1401, 1097, 987, 860, 534. Elemental analysis (%) calcd for C<sub>3</sub>H<sub>6</sub>N<sub>8</sub>O (170.16): C 21.18, H 3.55, N 65.86; found: C 21.13, H 3.58, N 65.87. BAM drop hammer: ≥ 40 J; friction tester: ≥ 360 N.

**Hydroxylammonium 5-(1H-1,2,4-triazol-4-ium-3-yl)-1H-tetrazol-1-olate (3).** White solid (94% yield). DSC (10 °C min<sup>-1</sup>): 238 °C (dec). <sup>1</sup>H NMR (DMSO-*d*<sub>6</sub>, 600 MHz) δ/ppm: 11.08 (1H, NOH), 8.33 (5H,

2NH, NH<sub>3</sub><sup>+</sup>). <sup>13</sup>C NMR (DMSO-*d*<sub>6</sub>, 150 MHz)  $\delta$ /ppm: 149.15, 146.41, 136.62. IR (KBr)  $\nu$ /cm<sup>-1</sup>: 3398, 1647, 1426, 1098, 987, 861, 534. Elemental analysis (%) calcd for C<sub>3</sub>H<sub>6</sub>N<sub>8</sub>O<sub>2</sub> (186.16): C 19.36, H 3.25, N 60.20; found: C 19.38, H 3.21, N 60.22. BAM drop hammer:  $\geq 40$  J; friction tester:  $\geq 360$  N.

**Hydrazinium 5-(1*H*-1,2,4-triazol-4-ium-3-yl)-1*H*-tetrazol-1-olate (4).** White solid (95% yield). DSC (10 °C min<sup>-1</sup>): 264 °C (dec). <sup>1</sup>H NMR (DMSO-*d*<sub>6</sub>, 600 MHz)  $\delta$ /ppm: 8.54 (7H, 2NH, NH<sub>2</sub>, NH<sub>3</sub><sup>+</sup>). <sup>13</sup>C NMR (DMSO-*d*<sub>6</sub>, 150 MHz)  $\delta$ /ppm: 147.67, 147.11, 139.99. IR (KBr)  $\nu$ /cm<sup>-1</sup>: 3399, 1646, 1092, 986, 862, 535. Elemental analysis (%) calcd for C<sub>3</sub>H<sub>7</sub>N<sub>9</sub>O (185.18): C 19.46, H 3.81, N 58.63; found: C 19.48, H 3.85, N 58.69. BAM drop hammer:  $\geq 40$  J; friction tester:  $\geq 360$  N.

### Nuclear magnetic resonance.

The structure of energetic compounds **1-4** was characterized by NMR. The deuterium reagent is DMSO. We have shown by solubility tests that energetic salts **2-4** are slightly soluble in the tested solvents. Therefore, <sup>13</sup>C NMR of energetic salt **2** has not been obtained. <sup>1</sup>H NMR and <sup>13</sup>C NMR of energetic compounds **1-4** are shown in Figs. S1-S7.

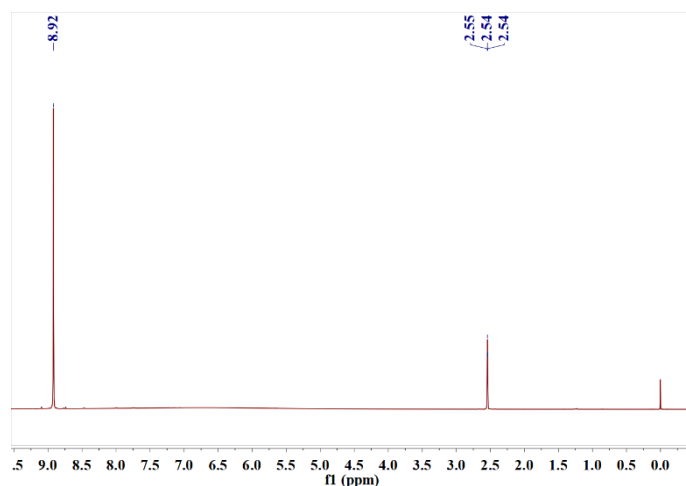

Fig. S1 <sup>1</sup>H NMR spectra of **1**·H<sub>2</sub>O

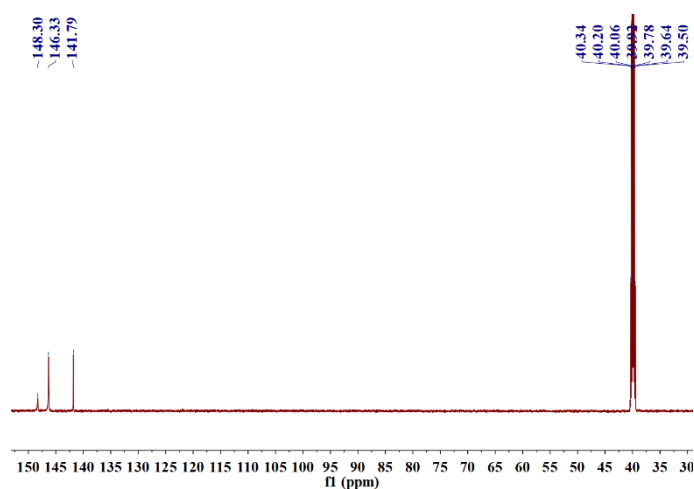

Fig. S2 <sup>13</sup>C NMR spectra of **1**·H<sub>2</sub>O

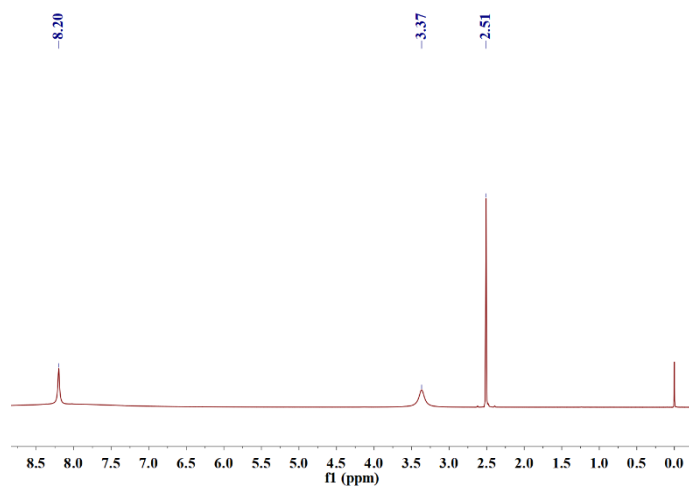

Fig. S3 <sup>1</sup>H NMR spectra of **2**

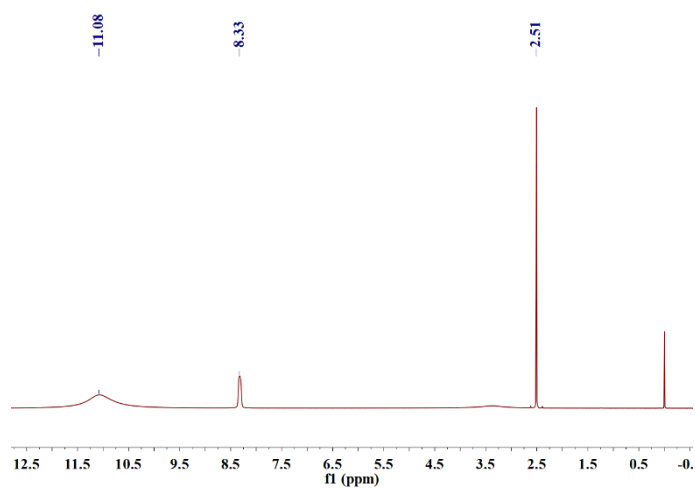

Fig. S4 <sup>1</sup>H NMR spectra of **3**

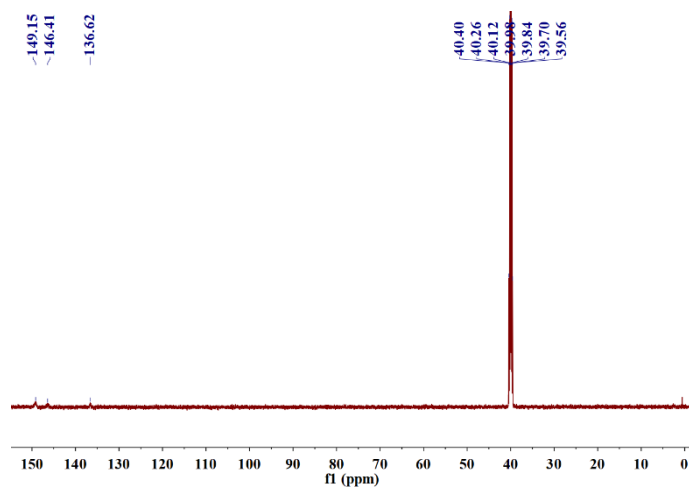

Fig. S5 <sup>13</sup>C NMR spectra of **3**

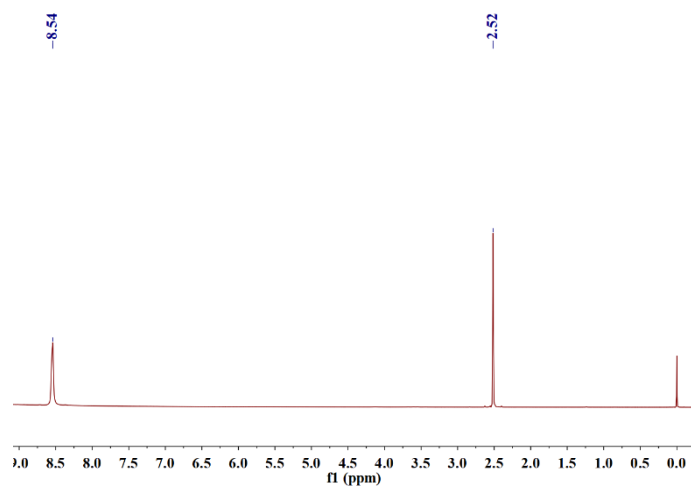

Fig. S6  $^1\text{H}$  NMR spectra of **4**

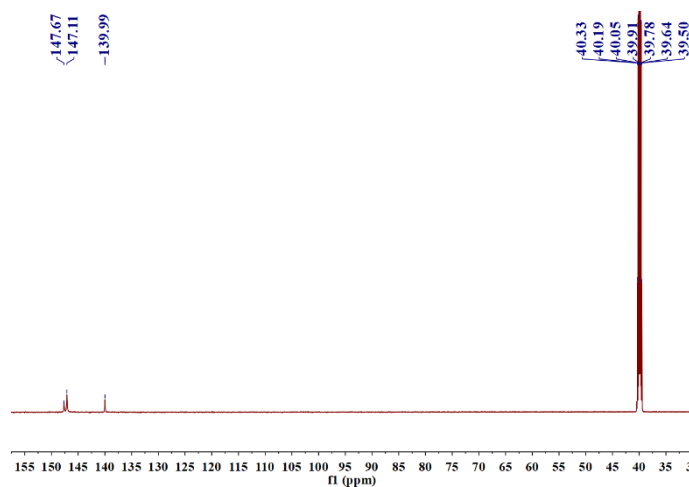

Fig. S7  $^{13}\text{C}$  NMR spectra of **4**

### X-ray Crystallography.

The single crystals of **1-4** were cultured via a slow solvent evaporation method. Data were collected using a three-circle Bruker platform diffractometer equipped with a SMART APEX II CCD detector. All calculations were performed using the Crystal Structure crystallographic software package except for refinement, which was performed using SHELXL2.<sup>[1]</sup> Hydrogen atoms were added theoretically and refined with riding model position parameters and fixed isotropic thermal parameters.

**Table S1.** Crystal data and structure refinement parameters of **1-4**

| <b>Compounds</b>                                      | <b>1·H<sub>2</sub>O</b>                                     | <b>2</b>                                       | <b>3</b>                                                    | <b>4</b>                                       |
|-------------------------------------------------------|-------------------------------------------------------------|------------------------------------------------|-------------------------------------------------------------|------------------------------------------------|
| Empirical formula                                     | C <sub>3</sub> H <sub>5</sub> N <sub>7</sub> O <sub>2</sub> | C <sub>3</sub> H <sub>6</sub> N <sub>8</sub> O | C <sub>3</sub> H <sub>6</sub> N <sub>8</sub> O <sub>2</sub> | C <sub>3</sub> H <sub>7</sub> N <sub>9</sub> O |
| Formula weight                                        | 171.14                                                      | 170.16                                         | 186.16                                                      | 185.18                                         |
| CCDC number                                           | 2171804                                                     | 2189511                                        | 2189512                                                     | 2189513                                        |
| Crystal size/mm <sup>3</sup>                          | 0.20×0.20×0.20                                              | 0.20×0.20×0.20                                 | 0.20×0.20×0.20                                              | 0.20×0.20×0.20                                 |
| Crystal system                                        | Orthorhombic                                                | Monoclinic                                     | Monoclinic                                                  | Monoclinic                                     |
| Space group                                           | <i>Pna</i> 2 <sub>1</sub>                                   | <i>Cc</i>                                      | <i>P</i> 2 <sub>1</sub> / <i>c</i>                          | <i>P</i> 2 <sub>1</sub> / <i>c</i>             |
| <i>a</i> [Å]                                          | 8.2815(3)                                                   | 3.6672(3)                                      | 12.7140(16)                                                 | 12.9556(15)                                    |
| <i>b</i> [Å]                                          | 16.56970(10)                                                | 24.648(2)                                      | 8.0602(10)                                                  | 8.7565(10)                                     |
| <i>c</i> [Å]                                          | 4.7742(3)                                                   | 7.3252(7)                                      | 7.0415(8)                                                   | 6.4841(8)                                      |
| <i>α</i> [Å]                                          | 90                                                          | 90                                             | 90                                                          | 90                                             |
| <i>β</i> [Å]                                          | 90                                                          | 98.280(3)                                      | 95.899(3)                                                   | 104.077(3)                                     |
| <i>γ</i> [Å]                                          | 90                                                          | 90                                             | 90                                                          | 90                                             |
| <i>V</i> [Å <sup>3</sup> ]                            | 655.13(5)                                                   | 655.21(10)                                     | 717.77(15)                                                  | 713.50(15)                                     |
| <i>Z</i>                                              | 4                                                           | 4                                              | 4                                                           | 4                                              |
| <i>T</i> [K]                                          | 296(2)                                                      | 296(2)                                         | 296(2)                                                      | 296(2)                                         |
| <i>ρ</i> [g cm <sup>-3</sup> ]                        | 1.735                                                       | 1.725                                          | 1.723                                                       | 1.724                                          |
| <i>μ</i> [mm <sup>-1</sup> ]                          | 0.146                                                       | 0.139                                          | 0.145                                                       | 0.139                                          |
| <i>F</i> (000)                                        | 352                                                         | 352                                            | 384                                                         | 384                                            |
|                                                       | -9 ≤ <i>h</i> ≤ 9                                           | -4 ≤ <i>h</i> ≤ 3                              | -15 ≤ <i>h</i> ≤ 15                                         | -15 ≤ <i>h</i> ≤ 15                            |
| Index range                                           | -17 ≤ <i>k</i> ≤ 19                                         | -30 ≤ <i>k</i> ≤ 25                            | -9 ≤ <i>k</i> ≤ 9                                           | -10 ≤ <i>h</i> ≤ 10                            |
|                                                       | -5 ≤ <i>l</i> ≤ 5                                           | -9 ≤ <i>l</i> ≤ 9                              | -8 ≤ <i>l</i> ≤ 8                                           | -7 ≤ <i>h</i> ≤ 7                              |
| Reflections collected                                 | 2739                                                        | 3026                                           | 12358                                                       | 13615                                          |
| <i>R</i> <sub>int</sub>                               | 0.0941                                                      | 0.0350                                         | 0.0384                                                      | 0.0643                                         |
| Data/Restraints/Parameters                            | 1009/1/109                                                  | 1192/21/121                                    | 1262/0/119                                                  | 1269/2/125                                     |
| GOF on <i>F</i> <sup>2</sup>                          | 1.052                                                       | 1.063                                          | 1.111                                                       | 1.178                                          |
| <i>R</i> <sub>1</sub> [ <i>I</i> > 2σ ( <i>I</i> ) ]  | 0.0624                                                      | 0.0386                                         | 0.0376                                                      | 0.0572                                         |
| <i>wR</i> <sub>2</sub> [ <i>I</i> > 2σ ( <i>I</i> ) ] | 0.1222                                                      | 0.0821                                         | 0.0848                                                      | 0.1306                                         |
| <i>R</i> <sub>1</sub> (all data)                      | 0.1267                                                      | 0.0489                                         | 0.0506                                                      | 0.0794                                         |
| <i>wR</i> <sub>2</sub> (all data)                     | 0.1519                                                      | 0.0881                                         | 0.0913                                                      | 0.1412                                         |
| Largest diff. peak and hole<br>[e Å <sup>-3</sup> ]   | 0.324/-0.403                                                | 0.171/-0.173                                   | 0.164/-0.207                                                | 0.315/-0.284                                   |



**Table S2.** Selected bond lengths [ $\text{\AA}$ ] of **1-4**

| <b>Atoms 1-2</b> | <b>d (1-2) [<math>\text{\AA}</math>]</b> | <b>Atoms 1-2</b> | <b>d (1-2) [<math>\text{\AA}</math>]</b> |
|------------------|------------------------------------------|------------------|------------------------------------------|
| <b>1</b>         |                                          | <b>2</b>         |                                          |
| <b>C1-N4</b>     | 1.313(10)                                | <b>C1-N1</b>     | 1.335(4)                                 |
| <b>C1-N1</b>     | 1.337(11)                                | <b>C1-N4</b>     | 1.338(4)                                 |
| <b>C1-C2</b>     | 1.450(11)                                | <b>C1-C2</b>     | 1.453(4)                                 |
| <b>C2-N5</b>     | 1.319(9)                                 | <b>C2-N6</b>     | 1.314(4)                                 |
| <b>C2-N6</b>     | 1.359(11)                                | <b>C2-N5</b>     | 1.360(4)                                 |
| <b>C3-N7</b>     | 1.318(11)                                | <b>C3-N7</b>     | 1.305(4)                                 |
| <b>C3-N6</b>     | 1.329(9)                                 | <b>C3-N5</b>     | 1.322(4)                                 |
| <b>C3-H3</b>     | 0.9300                                   | <b>N1-O1</b>     | 1.309(3)                                 |
| <b>N1-O1</b>     | 1.317(8)                                 | <b>N1-N2</b>     | 1.348(4)                                 |
| <b>N1-N2</b>     | 1.347(9)                                 | <b>N2-N3</b>     | 1.307(4)                                 |
| <b>N6-H6</b>     | 0.8600                                   | <b>N8-H8A</b>    | 0.92(2)                                  |
| <b>N7-H7</b>     | 0.8600                                   | <b>N8-H8B</b>    | 0.87(2)                                  |
| <b>3</b>         |                                          | <b>4</b>         |                                          |
| <b>C1-N4</b>     | 1.332(2)                                 | <b>C1-N4</b>     | 1.328(4)                                 |
| <b>C1-N1</b>     | 1.333(2)                                 | <b>C1-N1</b>     | 1.342(4)                                 |
| <b>C1-C2</b>     | 1.450(2)                                 | <b>C1-C2</b>     | 1.452(4)                                 |
| <b>C2-N6</b>     | 1.320(2)                                 | <b>C2-N6</b>     | 1.353(4)                                 |
| <b>C2-N5</b>     | 1.357(2)                                 | <b>C3-N7</b>     | 1.312(4)                                 |
| <b>N6-N7</b>     | 1.349(2)                                 | <b>C3-N6</b>     | 1.330(4)                                 |
| <b>N1-O1</b>     | 1.3256(17)                               | <b>N1-O1</b>     | 1.323(3)                                 |
| <b>N1-N2</b>     | 1.343(2)                                 | <b>N1-N2</b>     | 1.341(3)                                 |
| <b>N8-O2</b>     | 1.4058(18)                               | <b>N2-N3</b>     | 1.316(4)                                 |
| <b>H2-O2</b>     | 0.8200                                   | <b>N8-H8A</b>    | 0.889(18)                                |
| <b>N8-H8A</b>    | 0.8900                                   | <b>N8-H8B</b>    | 0.896(19)                                |
| <b>N8-H8B</b>    | 0.8900                                   | <b>N9-H9A</b>    | 0.8900                                   |

**Table S3.** Selected bond angles [°] of **1-4**

| Atoms 1-2-3 | $\angle$ (1-2-3) [°] | Atoms 1-2-3 | $\angle$ (1-2-3) [°] |
|-------------|----------------------|-------------|----------------------|
| <b>1</b>    |                      | <b>2</b>    |                      |
| N4-C1-N1    | 108.2(7)             | N4-C1-N1    | 108.5(3)             |
| N4-C1-C2    | 126.3(8)             | C2-C1-N1    | 126.7(3)             |
| N1-C1-C2    | 125.5(8)             | N4-C1-C2    | 124.8(3)             |
| N5-C2-N6    | 112.0(7)             | N5-C2-N6    | 115.0(3)             |
| N5-C2-C1    | 124.4(8)             | N6-C2-C1    | 120.5(3)             |
| N6-C2-C1    | 123.6(7)             | N5-C2-C1    | 124.5(3)             |
| O1-N1-C1    | 129.6(7)             | O1-N1-C1    | 130.4(3)             |
| O1-N1-N2    | 121.9(7)             | O1-N1-N2    | 121.4(3)             |
| C1-N1-N2    | 108.5(7)             | C1-N1-N2    | 108.2(3)             |
| N1-N2-N3    | 105.9(7)             | N1-N2-N3    | 106.5(3)             |
| N2-N3-N4    | 110.4(7)             | N2-N3-N4    | 111.0(3)             |
| C2-N6-C3    | 118.24(14)           | C2-N6-N6    | 110.9(3)             |
| C2-N6-H6    | 127.2                | C3-N7-H7    | 124.5                |
| <b>3</b>    |                      | <b>4</b>    |                      |
| N4-C1-N1    | 107.99(15)           | N4-C1-N1    | 107.7(2)             |
| N4-C1-C2    | 124.39(15)           | N4-C1-C2    | 124.8(3)             |
| N1-C1-C2    | 127.61(16)           | N1-C1-C2    | 127.5(3)             |
| N5-C2-N6    | 114.59(16)           | N5-C2-N6    | 114.8(3)             |
| N6-C2-C1    | 119.28(16)           | N5-C2-C1    | 119.8(3)             |
| N5-C2-C1    | 126.13(15)           | N6-C2-C1    | 125.4(3)             |
| O1-N1-C1    | 129.58(14)           | O1-N1-C1    | 122.0(2)             |
| O1-N1-N2    | 121.39(13)           | O1-N1-N2    | 128.9(2)             |
| C1-N1-N2    | 109.03(14)           | C1-N1-N2    | 109.1(2)             |
| N1-N2-N3    | 106.17(14)           | N1-N2-N3    | 106.1(2)             |
| N2-N3-N4    | 110.66(15)           | N2-N3-N4    | 110.3(2)             |
| C1-N4-N3    | 106.15(14)           | C2-N5-N7    | 102.2(3)             |
| N7-C3-H3    | 124.8                | C3-N7-N5    | 110.5(3)             |

**Table S4.** Selected torsion angles [°] of 1-4

| Atoms(1-2-3-4) | $\alpha$ (1-2-3-4) [°] | Atoms(1-2-3-4) | $\alpha$ (1-2-3-4) [°] |
|----------------|------------------------|----------------|------------------------|
| <b>1</b>       |                        | <b>2</b>       |                        |
| N4-C1-C2-N5    | 179.1(9)               | N1-C1-C2-N6    | 171.9(3)               |
| N1-C1-C2-N5    | -0.4(12)               | N4-C1-C2-N6    | -6.7(5)                |
| N4-C1-C2-N6    | 0.4(12)                | N1-C1-C2-N5    | -8.0(5)                |
| N1-C1-C2-N6    | -179.1(9)              | N4-C1-C2-N5    | 173.3(3)               |
| N4-C1-N1-O1    | -179.7(7)              | N4-C1-N1-O1    | -179.0(3)              |
| C2-C1-N1-O1    | 0.0(13)                | C2-C1-N1-O1    | 2.2(5)                 |
| N4-C1-N1-N2    | -0.4(9)                | N4-C1-N1-N2    | 0.1(3)                 |
| C2-C1-N1-N2    | 179.2(7)               | C2-C1-N1-N2    | -178.8(3)              |
| O1-N1-N2-N3    | 179.2(6)               | O1-N1-N2-N3    | 179.3(3)               |
| C1-N1-N2-N3    | 0.0(9)                 | C1-N1-N2-N3    | 0.2(3)                 |
| N1-N2-N3-N4    | 0.5(9)                 | N1-N2-N3-N4    | -0.3(4)                |
| N1-C1-N4-N3    | 0.7(9)                 | N1-C1-N4-N3    | -0.3(3)                |
| <b>3</b>       |                        | <b>4</b>       |                        |
| N4-C1-C2-N6    | -1.4(3)                | N4-C1-C2-N5    | -4.4(5)                |
| N1-C1-C2-N6    | -179.79(17)            | N1-C1-C2-N5    | 175.8(3)               |
| N4-C1-C2-N5    | 177.55(18)             | N4-C1-C2-N6    | 174.5(3)               |
| N1-C1-C2-N5    | -0.8(3)                | N1-C1-C2-N6    | -5.3(5)                |
| N4-C1-N1-O1    | 179.84(15)             | N4-C1-N1-O1    | -179.5(3)              |
| C2-C1-N1-O1    | -1.6(3)                | C2-C1-N1-O1    | 0.3(5)                 |
| N4-C1-N1-N2    | -0.26(19)              | N4-C1-N1-N2    | -0.2(3)                |
| C2-C1-N1-N2    | 178.33(16)             | C2-C1-N1-N2    | 179.5(3)               |
| O1-N1-N2-N3    | -179.83(14)            | O1-N1-N2-N3    | 179.6(2)               |
| C1-N1-N2-N3    | 0.26(19)               | C1-N1-N2-N3    | 0.3(3)                 |
| N1-N2-N3-N4    | -0.16(19)              | N1-N2-N3-N4    | -0.2(3)                |
| N1-C1-N4-N3    | 0.15(19)               | N1-C1-N4-N3    | 0.1(3)                 |

**Table S5.** Selected hydrogen bond angles [°] of **1-4**

| Atoms(D-H···A) | d(A···D) [Å] | Atoms(D-H···A) | d(A···D) [Å] |
|----------------|--------------|----------------|--------------|
| <b>1</b>       |              | <b>2</b>       |              |
| N7-H7···O2     | 2.574        | N8-H8A···O1    | 2.873        |
| O2-H2A···O1    | 2.871        | N8-H8B···N5    | 2.915        |
| O2-H2A···N4    | 2.822        | N8-H8B···O1    | 3.032        |
| O2-H2B···N7    | 3.060        | N8-H8C···N2    | 3.120        |
| N6-H6···O1     | 2.578        | N8-H8D···O1    | 2.942        |
| N6-H6···N4     | 2.980        | N7-H7···N4     | 2.104        |
| <b>3</b>       |              | <b>4</b>       |              |
| N8-H8A···N3    | 2.987        | N8-H8A···O1    | 3.078        |
| N8-H8A···N5    | 2.934        | N8-H8B···O1    | 3.078        |
| N8-H8B···O1    | 2.786        | N9-H9A···O1    | 2.823        |
| N8-H8B···N3    | 2.987        | N9-H9B···N8    | 2.922        |
| N8-H8B···O2    | 1.408        | N9-H9C···O1    | 2.890        |
| O2-H2···O1     | 2.630        | N9-H9C···N6    | 3.031        |
| O2-H2···N8     | 1.408        | N7-H7···N4     | 2.843        |

## Heats of formation

The constant-volume combustion energies of four compounds were measured by a precise oxygen bomb calorimeter. The experimental constant volume combustion energies ( $\Delta_c U$ ) of compounds can be converted to the standard molar combustion enthalpy ( $\Delta_c H_m^\theta$ ) based on equation (1).<sup>[2]</sup> Their combustion reaction equation is listed as equation (2-5):

$$\Delta_c H_m^\theta = \Delta_c U + \Delta nRT \quad (1)$$

where  $\Delta n = n_g(\text{products}) - n_g(\text{reactants})$ , ( $n_g$  is the total molar amount of gases in the products or reactants,  $R = 8.314 \text{ J}\cdot\text{mol}^{-1}\cdot\text{K}^{-1}$ ,  $T = 298.15 \text{ K}$ ).

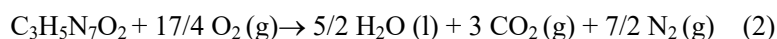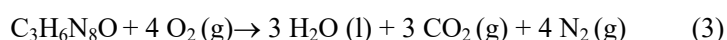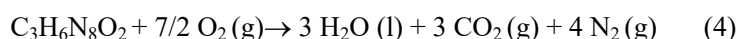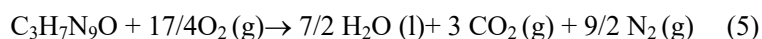

Based on the calculated enthalpies of combustion and known enthalpies of formation of the combustion products determined experimentally,<sup>[3]</sup>  $\Delta_f H_m^\theta(\text{H}_2\text{O}, \text{l}) = -285.83 \text{ kJ}\cdot\text{mol}^{-1}$ ,  $\Delta_f H_m^\theta(\text{CO}_2, \text{g}) = -393.51 \text{ kJ}\cdot\text{mol}^{-1}$ . The  $\Delta_c U$  of **1-4** was  $-1919.71 \text{ kJ}\cdot\text{mol}^{-1}$  and  $-2368.58 \text{ kJ}\cdot\text{mol}^{-1}$ ,  $-2279.48 \text{ kJ}\cdot\text{mol}^{-1}$  and  $-2524.07 \text{ kJ}\cdot\text{mol}^{-1}$ , respectively, measured by a precise oxygen bomb calorimeter. The  $\Delta_c H_m^\theta$  of **1-4** was calculated as  $-1903.61 \text{ kJ}\cdot\text{mol}^{-1}$  and  $-2351.24 \text{ kJ}\cdot\text{mol}^{-1}$ ,  $-2262.14 \text{ kJ}\cdot\text{mol}^{-1}$  and  $-2505.49 \text{ kJ}\cdot\text{mol}^{-1}$ , respectively.

## Reference

[1] Bruker. APEX2 v2010.3-0. Bruker AXS Inc. Madison, Wisconsin, USA. **2010**.

[2] Zhang, J. H.; Jin, B.; Li, X.Y.; Hao, W. J.; Huang, T.; Lei, B.; Guo, Z. C.; Shen, J.; Peng, R. F. Study of  $\text{H}_2\text{AzTO}$ -based energetic metal-organic frameworks for catalyzing the thermal decomposition of ammonium perchlorate. *Chem. Eng. J.* **2021**, *404*, 126287–126293.
